# Supplementary material for: Analysis of the Microprocessor in Dictyostelium: The Role of RbdB, a dsRNA Binding Protein
Source: PubMed Central journal article supplement (PMC4894637; doi:10.1371/journal.pgen.1006057), 2016-06-06

# miRNA D1-5p\_miRNA D1-3p

miRNA D1-5p

miRNA D1-3p

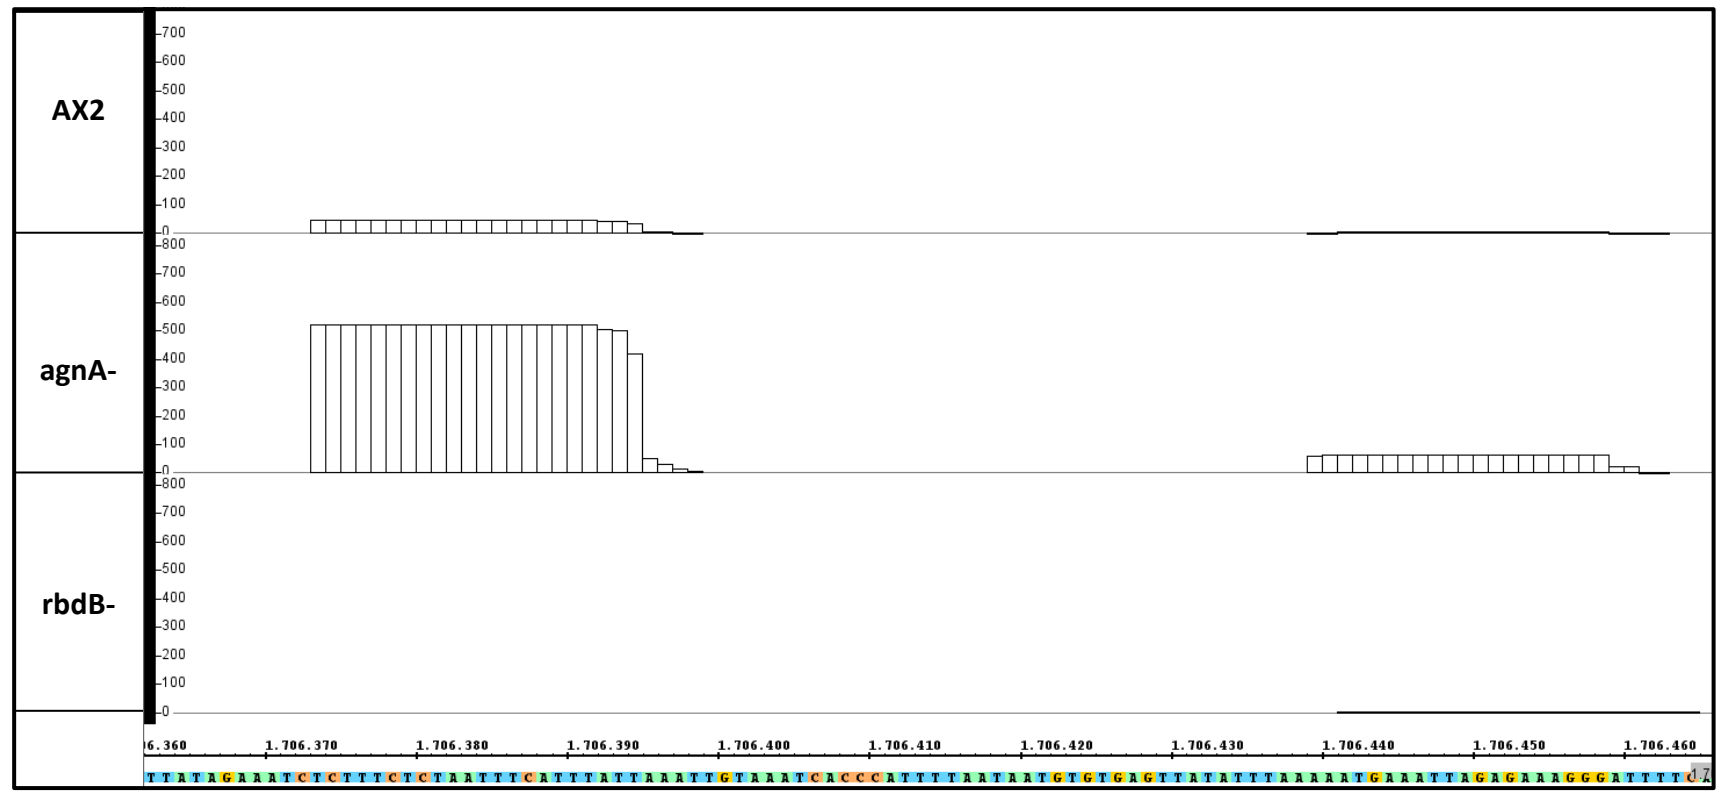

miRNA D2-5p\_miRNA D2-3p

miRNA D2-5p

miRNA D2-3p

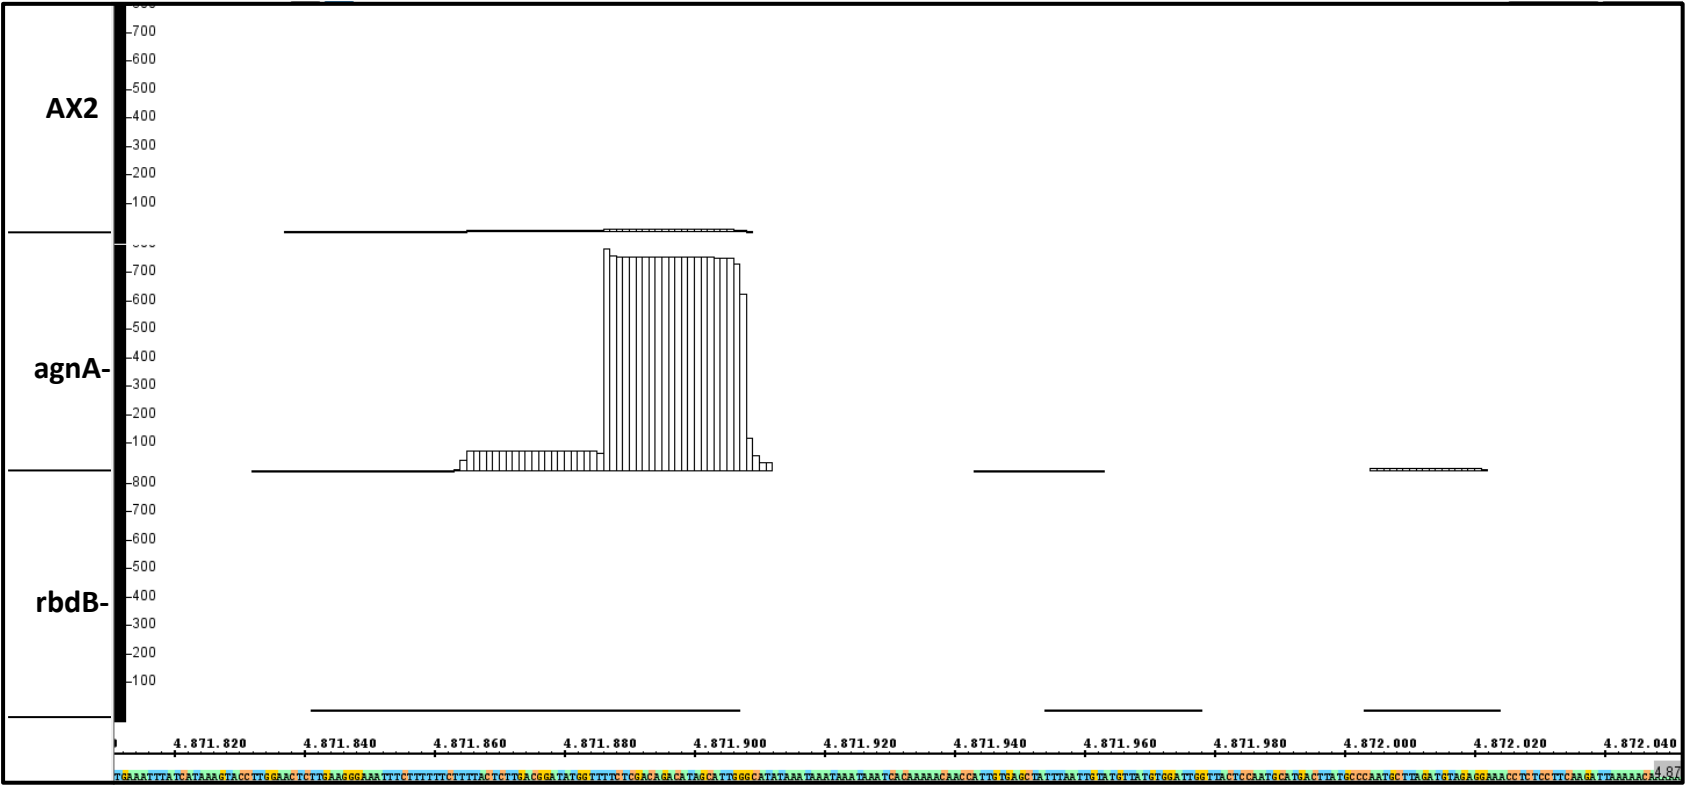

# miRNA D3-5p\_miRNA D2-3p

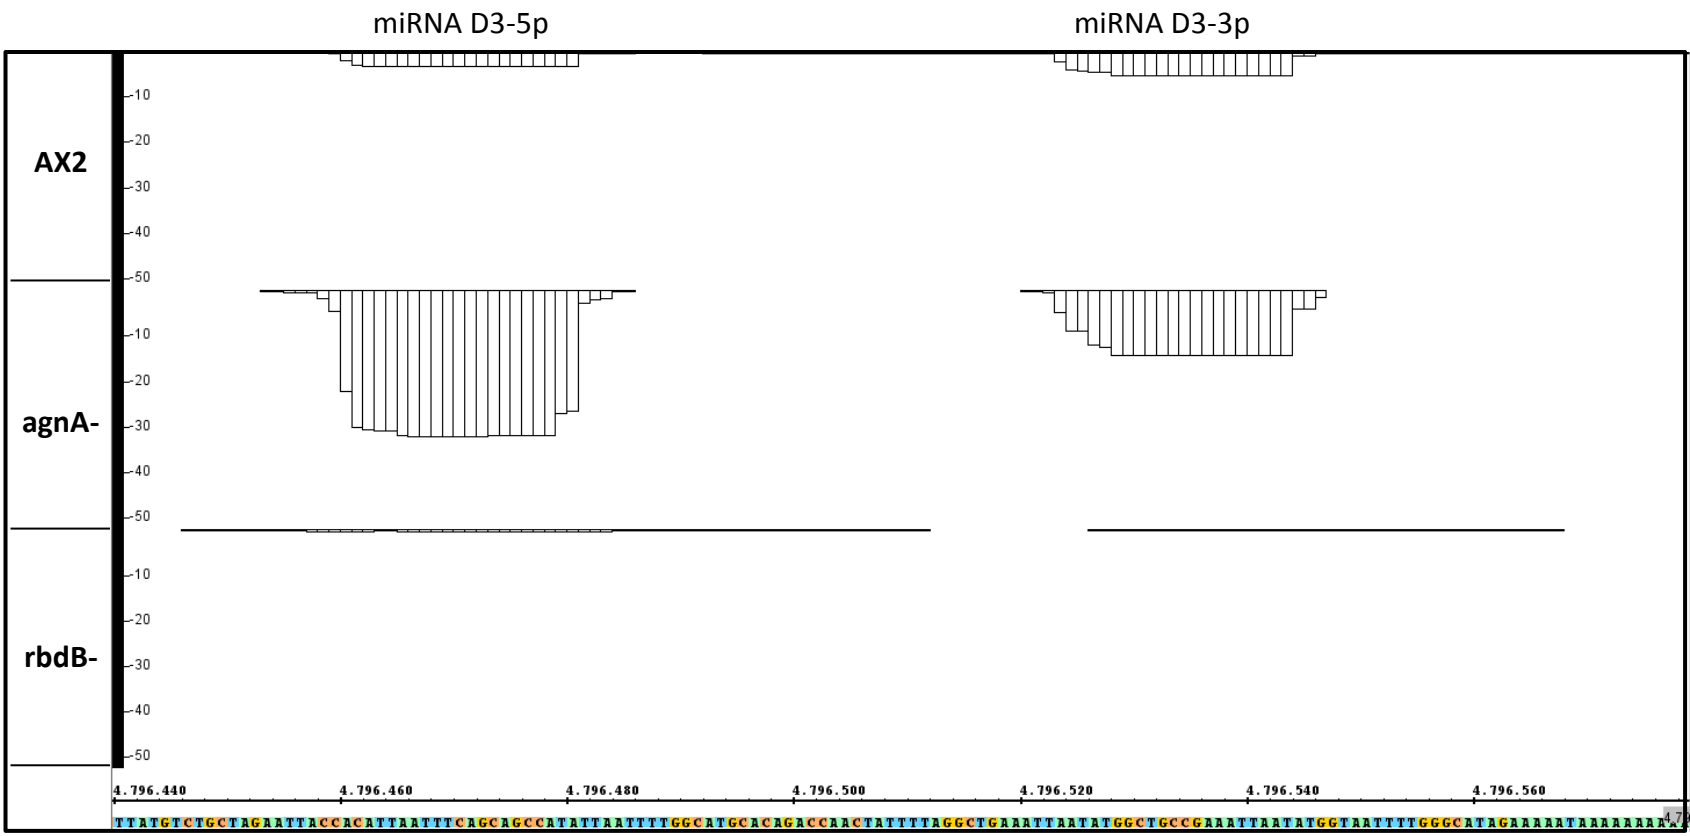

# small RNA D4

D4

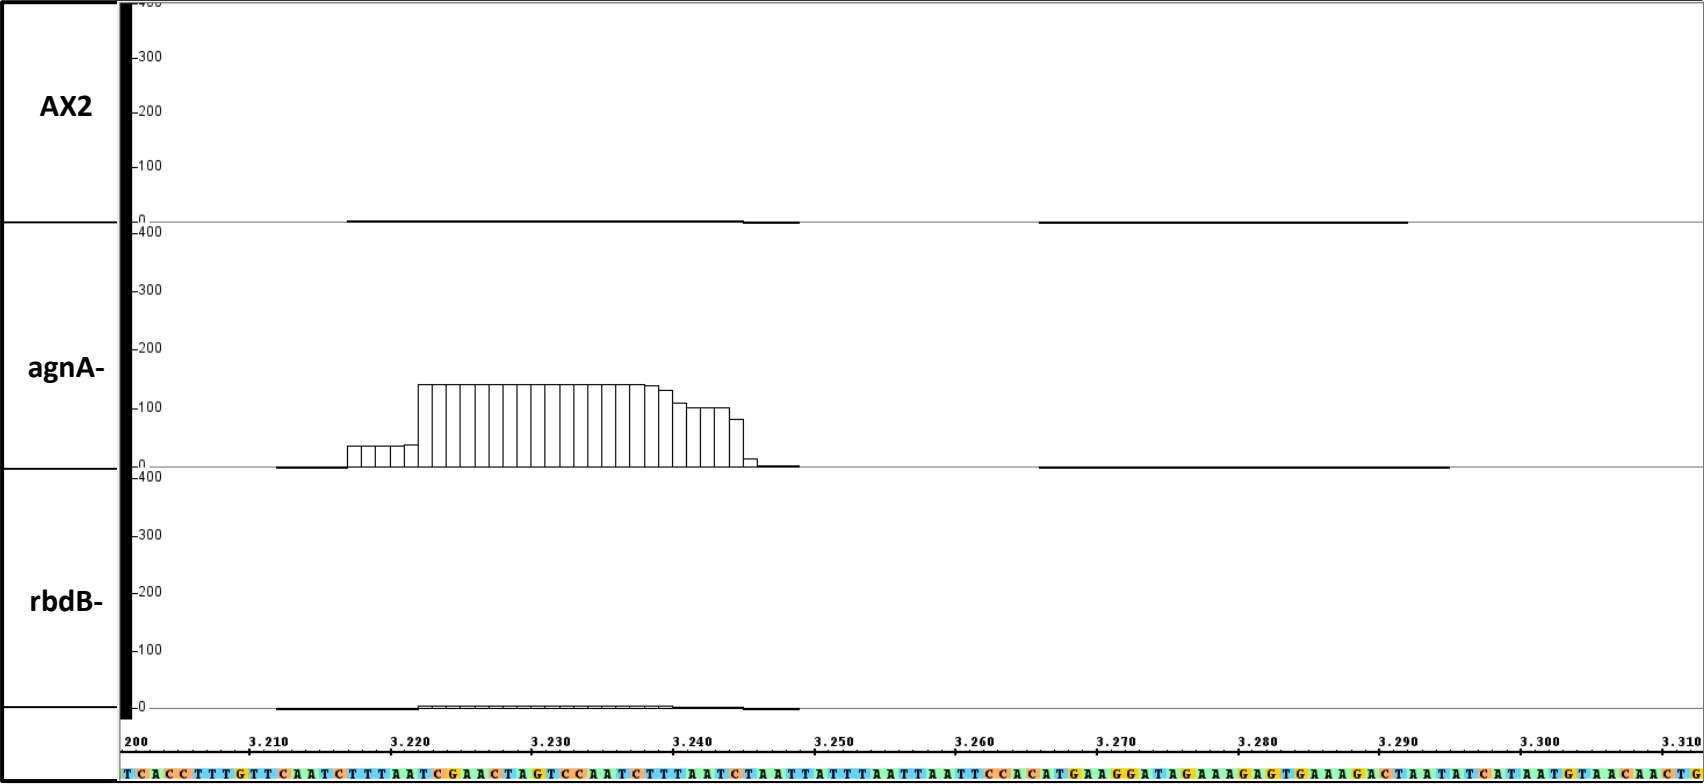

ddi-miR-7097\_ddi-miR-7097\*

ddi-miR-7097\*

ddi-miR-7097

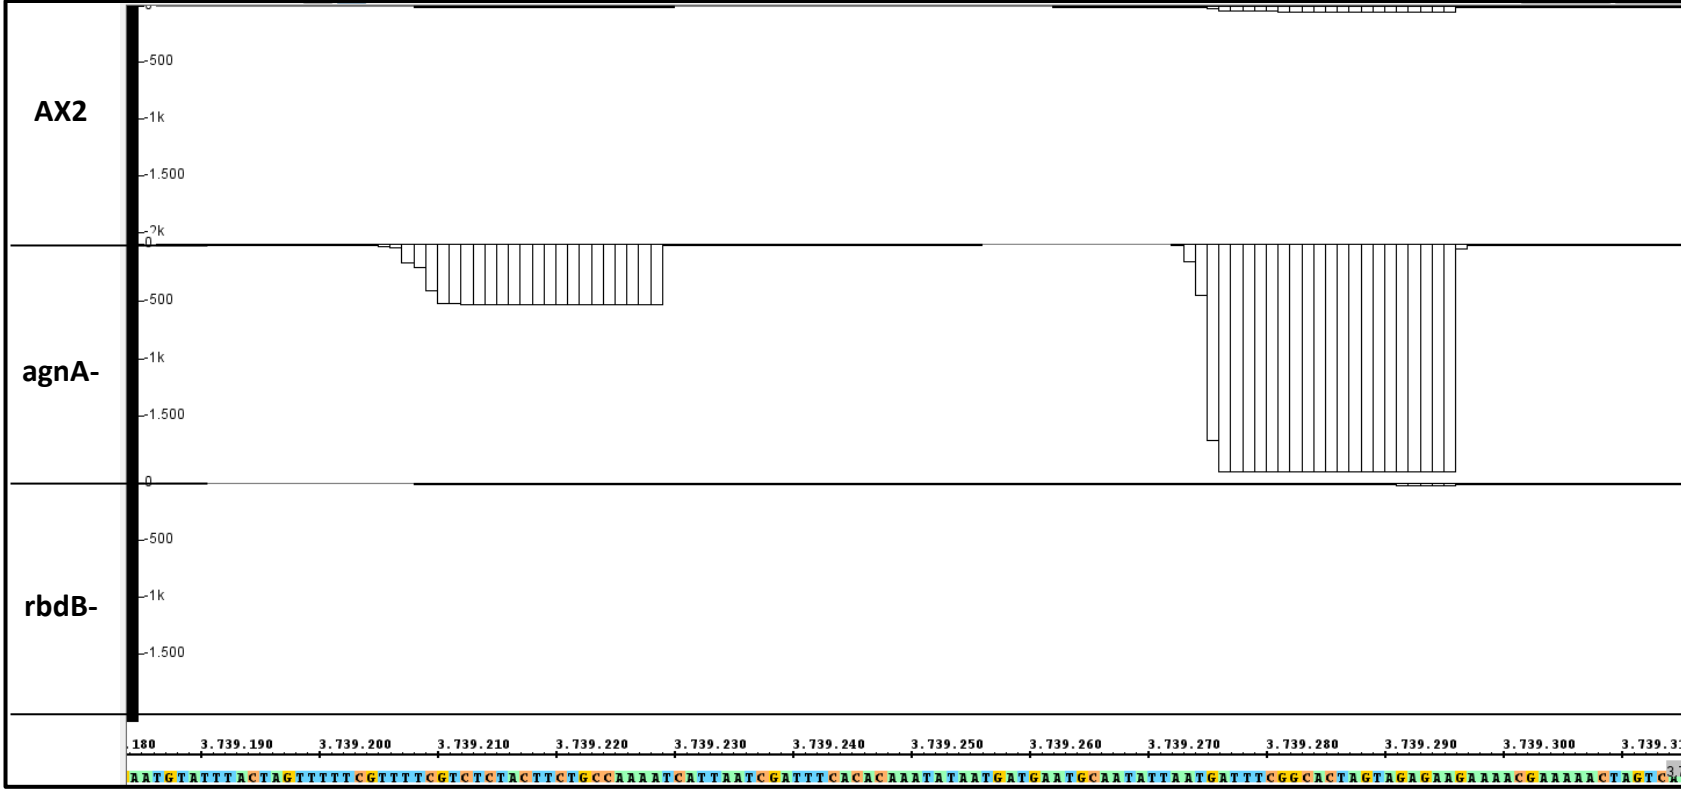

# ddi-miR-1176\_ddi-miR-1176\*

ddi-miR-1176

ddi-miR-1176\*

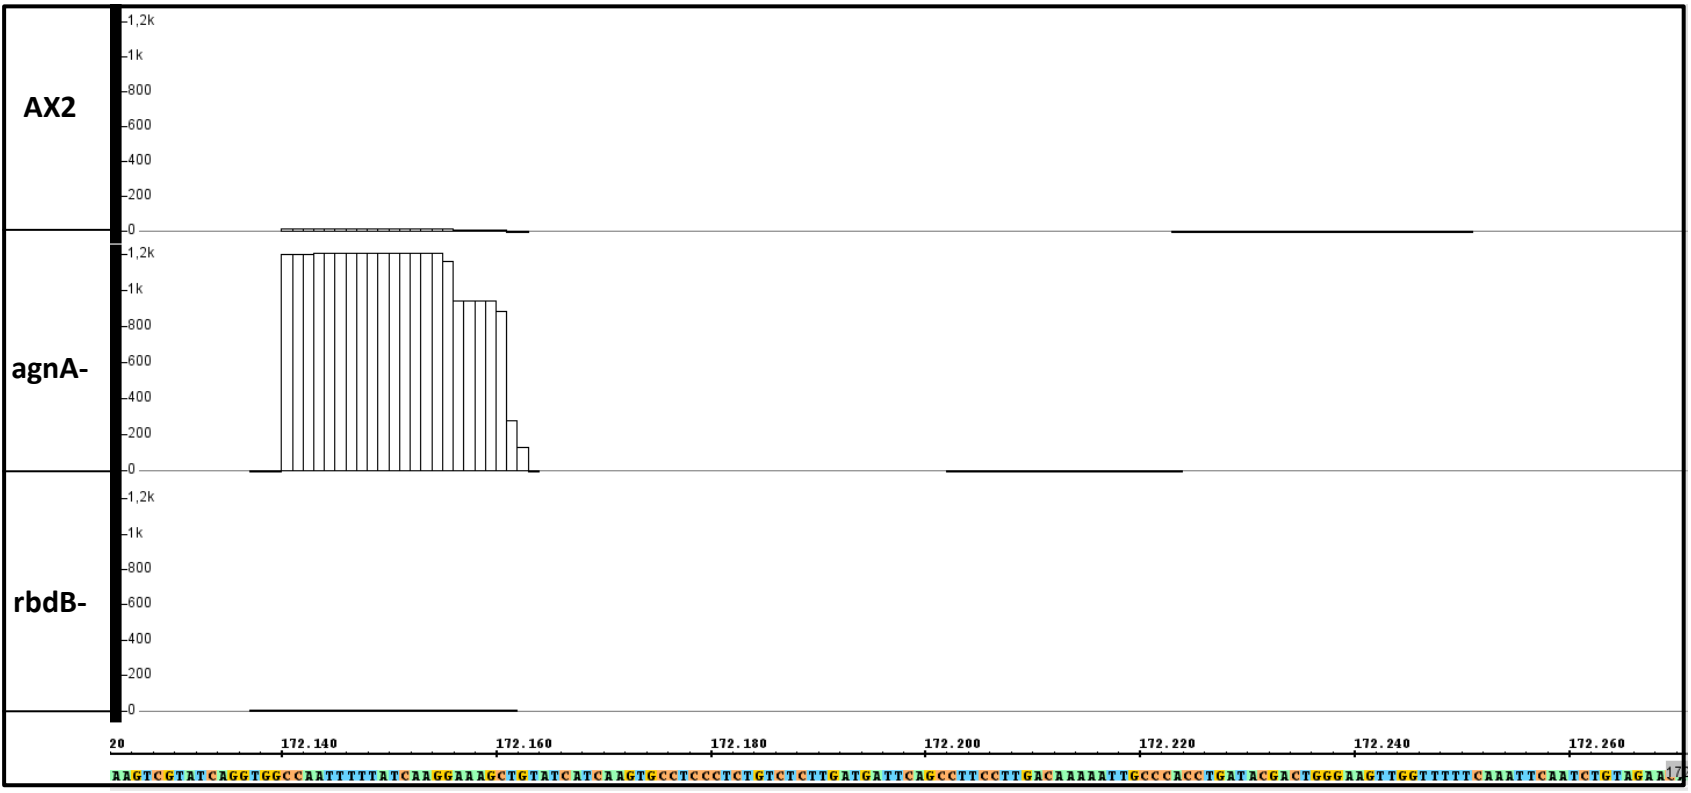

# ddi-miR-1177\_ddi-miR-1177\*

ddi-miR-1177-5p

ddi-miR-1177-3p

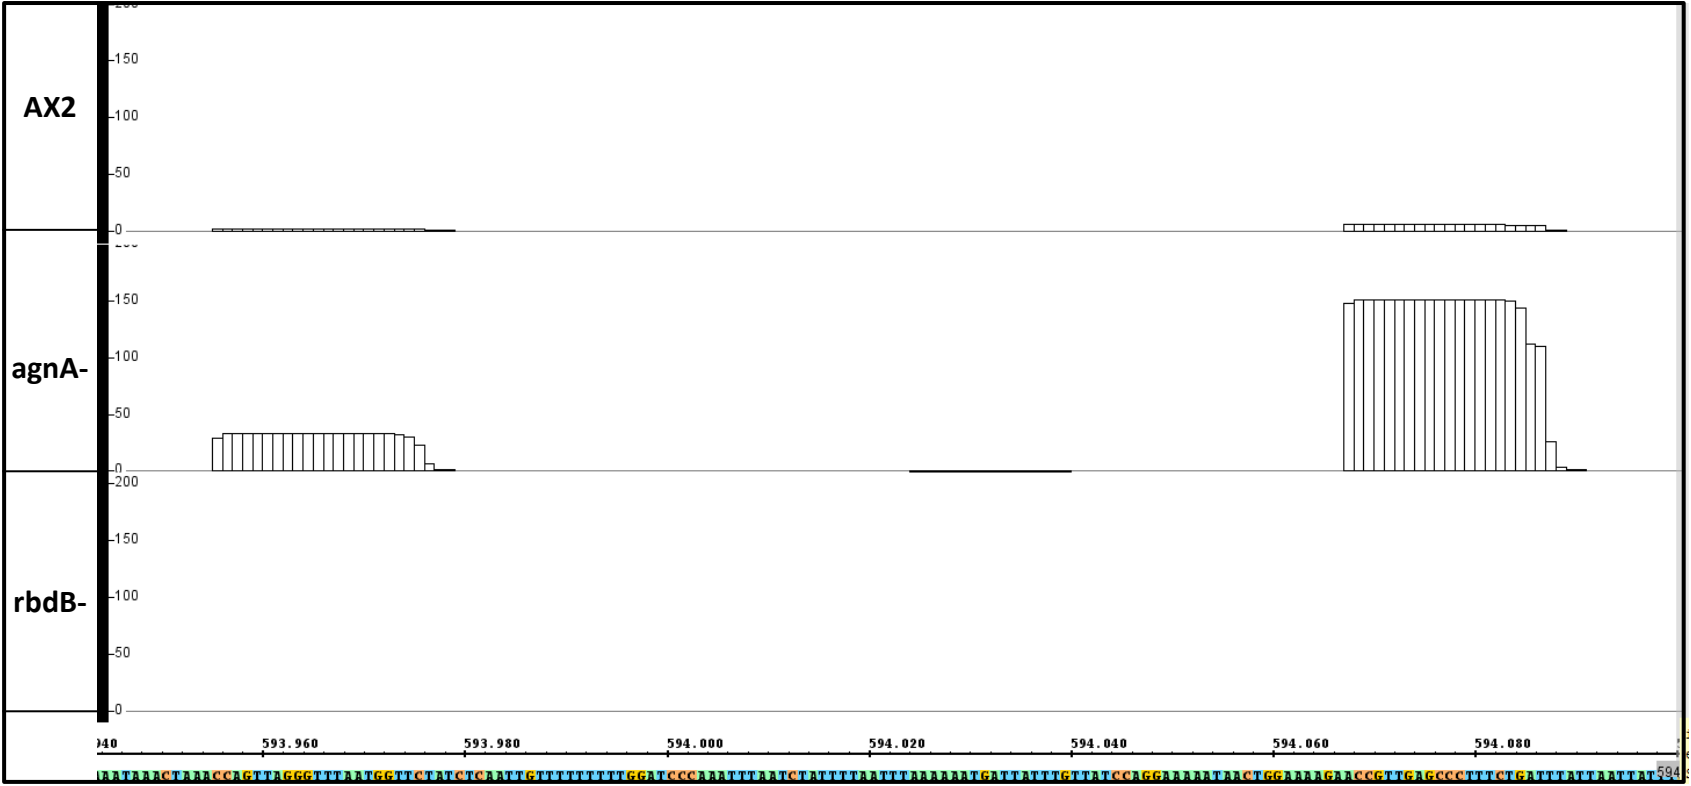

Supplement: pgen.1006057.s007.pdf [file pgen.1006057.s007.pdf]
